# Supplementary material
Source: publisher site journal article supplement (https://www.spandidos-publications.com/7189/downloadSupplementary)
Supplement: Supplementary file 1 [file downloadSupplementary]

|                                 |      |   |   |   |   |    |   |   |   |   |
|---------------------------------|------|---|---|---|---|----|---|---|---|---|
| Noguchi <i>et al</i> 2020       | (51) | ★ | ★ | - | ★ | ★  | ★ | ★ | - | 6 |
| Minichsdorfer <i>et al</i> 2022 | (46) | ★ | ★ | ★ | ★ | ★  | ★ | ★ | - | 7 |
| Tada <i>et al</i> 2023          | (54) | ★ | ★ | - | ★ | ★  | ★ | ★ | ★ | 7 |
| Yang <i>et al</i> 2022          | (61) | ★ | ★ | - | ★ | ★★ | ★ | ★ | ★ | 8 |
| Mortensen <i>et al</i> 2023     | (48) | ★ | ★ | ★ | ★ | ★  | ★ | ★ | - | 7 |
| Tanaka <i>et al</i> 2023        | (64) | ★ | ★ | - | ★ | ★  | ★ | ★ | - | 6 |
| Niwa <i>et al</i> 2020          | (50) | ★ | - | ★ | ★ | ★  | ★ | ★ | - | 6 |

UC, urothelial carcinoma; RCC, renal cell carcinoma.
